# Supplementary material for: Utilizing Machine Learning Models for Predicting Outcomes in Acute Pancreatitis: Development and Validation in Three Retrospective Cohorts
Source: Research Square preprint supplement (doi:10.21203/rs.3.rs-5881028/v1), 2025-02-03
Supplement: Supplementary file 1 [file 247e5249a3c18ca8201bc70c.xlsx]

## Sheet: Sheet3
Table 4. Different outcomes corresponding to various patient categories
Outcomes	All (n = 2559)	Patients underwent operations			Patients admitted to the ICU
		Yes (n = 1091)	No (n = 1468)	P-value	Yes (n = 636)	No (n = 1923)	P-value
In-hospital mortality	82 (3.20%)	26 (2.38%)	56 (3.81%)	0.055	76 (11.95%)	6 (0.31%)	<0.001
Re-admission within 30 days after discharge	222 (8.68%)	78 (7.15%)	144 (9.81%)	0.022	39 (6.13%)	183 (9.52%)	0.011
Re-admission within 60 days after discharge	288 (11.25%)	105 (9.62%)	183 (12.47%)	0.029	56 (8.81%)	232 (12.06%)	0.029
Re-admission within 90 days after discharge	322 (12.58%)	114 (10.45%)	208 (14.17%)	0.006	65 (10.22%)	257 (13.36%)	0.045
Mortality within 180 days after discharge	109 (4.26%)	53 (4.86%)	56 (3.81%)	0.233	50 (7.86%)	59 (3.07%)	<0.001
Mortality within 365 days after discharge	154 (6.02%)	82 (7.52%)	72 (4.90%)	0.008	62 (9.75%)	92 (4.78%)	<0.001
ICU, intensive care unit.
