# Supplementary material for: Utilizing Machine Learning Models for Predicting Outcomes in Acute Pancreatitis: Development and Validation in Three Retrospective Cohorts
Source: Research Square preprint supplement (doi:10.21203/rs.3.rs-5881028/v1), 2025-02-03
Supplement: Supplementary file 2 [file 3b07a3ce0e4e349ea613ece6.xlsx]

## Sheet: Sheet2
Table 2. Analysis of factors leading to different outcomes of all the patients (n=2559)
Factors	Outcomes
	Death in hospital P value	Re-admission within 30 days after discharge P value	Re-admission within 60 days after discharge P value	Re-admission within 90 days after discharge P value	Death within 180 days after discharge P value	Death within 365 days after discharge P value
Age	<0.001	<0.001	<0.001	<0.001	<0.001	<0.001
Gender	0.706	0.748	0.407	0.178	0.987	0.51
Length of stay in hospital	<0.001	0.001	<0.001	<0.001	<0.001	<0.001
Length of stay in ICU	<0.001	0.012	0.037	0.065	<0.001	<0.001
Surgical operations	0.065	0.007	0.001	<0.001	0.012	0.013
Endoscopy	0.105	0.064	0.131	0.063	0.034	<0.001
Interventional operations	0.067	0.032	0.101	0.054	0.013	<0.001
Surgical or interventional or endoscopic operations	0.055	0.022	0.029	0.006	0.233	0.008
Endoscopy combined with surgical operations	0.044	0.006	0.001	0.001	0.157	0.179
Endoscopy combined with interventional operations	0.08	0.032	0.083	0.046	0.03	<0.001
Surgical or interventional operations other than endoscopy	0.655	0.435	0.246	0.121	0.216	0.267
Endoscopic, surgical, and interventional procedures were performed during a single hospitalization	0.046	0.006	0.002	0.001	0.168	0.195
Hypertension	0.969	0.278	0.328	0.259	0.283	0.816
Diabetes	0.015	0.17	0.195	0.169	0.013	0.023
Anion gap _ max	<0.001	0.601	0.932	0.61	<0.001	<0.001
Anion gap _ avg	<0.001	0.059	0.017	0.006	0.001	0.006
Anion gap _ min	0.802	0.004	<0.001	<0.001	0.194	0.074
Bicarbonate _ max	0.007	<0.001	<0.001	<0.001	0.252	0.668
Bicarbonate _ avg	<0.001	<0.001	<0.001	<0.001	<0.001	<0.001
Bicarbonate _ min	<0.001	0.08	0.116	0.101	<0.001	<0.001
Chloride _ max	<0.001	0.421	0.546	0.631	<0.001	<0.001
Chloride _ avg	0.205	0.004	0.005	0.005	0.063	0.363
Chloride _ min	<0.001	0.003	0.001	<0.001	0.156	0.026
Creatinine _ max	<0.001	0.245	0.171	0.045	<0.001	<0.001
Creatinine _ avg	<0.001	0.073	0.02	0.003	<0.001	<0.001
Creatinine _ min	<0.001	0.024	0.002	<0.001	<0.001	0.004
Glucose _ max	<0.001	0.39	0.065	0.103	<0.001	<0.001
Glucose _ avg	<0.001	0.278	0.054	0.067	0.001	0.002
Glucose _ min	0.532	0.757	0.943	0.732	0.022	0.039
Potassium _ max	<0.001	0.017	0.003	0.001	<0.001	<0.001
Potassium _ avg	<0.001	0.024	0.004	0.003	0.716	0.745
Potassium _ min	<0.001	0.591	0.644	0.978	<0.001	<0.001
Sodium _ max	<0.001	0.788	0.535	0.663	0.001	0.004
Sodium _ avg	0.476	0.289	0.256	0.139	0.262	0.966
Sodium _ min	<0.001	0.131	0.018	0.007	0.004	<0.001
Urea nitrogen _ max	<0.001	0.673	0.626	0.421	<0.001	<0.001
Urea nitrogen _ avg	<0.001	0.221	0.117	0.061	<0.001	<0.001
Urea nitrogen _ min	<0.001	0.009	0.001	0.001	<0.001	<0.001
Hematocrit _ max	0.059	0.245	0.273	0.166	0.002	<0.001
Hematocrit _ avg	<0.001	0.065	0.023	0.013	<0.001	<0.001
Hematocrit _ min	<0.001	0.142	0.046	0.027	<0.001	<0.001
Hemoglobin _ max	0.013	0.133	0.129	0.062	<0.001	<0.001
Hemoglobin _ avg	<0.001	0.03	0.009	0.005	<0.001	<0.001
Hemoglobin _ min	<0.001	0.061	0.022	0.013	<0.001	<0.001
MCH _ max	0.005	0.097	0.197	0.148	0.279	0.157
MCH _ avg	0.222	0.015	0.02	0.016	0.586	0.967
MCH _ min	0.761	0.014	0.009	0.008	0.113	0.291
MCHC _ max	0.213	0.082	0.195	0.084	0.253	0.258
MCHC _ avg	<0.001	0.007	0.004	0.002	<0.001	<0.001
MCHC _ min	<0.001	0.025	0.006	0.003	<0.001	<0.001
MCV _ max	<0.001	0.607	0.837	0.776	0.001	0.001
MCV _ avg	<0.001	0.245	0.537	0.621	0.07	0.027
MCV _ min	0.325	0.12	0.21	0.296	0.985	0.47
PLT _ max	0.195	<0.001	<0.001	<0.001	0.277	0.572
PLT _ avg	<0.001	<0.001	<0.001	<0.001	0.436	0.24
PLT _ min	<0.001	<0.001	<0.001	<0.001	0.002	0.001
RDW _ max	<0.001	0.712	0.208	0.166	<0.001	<0.001
RDW _ avg	<0.001	0.9	0.605	0.513	<0.001	<0.001
RDW _ min	<0.001	0.565	0.955	0.942	<0.001	<0.001
RBC _ max	0.009	0.417	0.329	0.152	0.001	<0.001
RBC _ avg	<0.001	0.213	0.06	0.029	<0.001	<0.001
RBC _ min	<0.001	0.293	0.085	0.042	<0.001	<0.001
WBC _ max	<0.001	0.236	0.068	0.089	0.001	0.002
WBC _ avg	<0.001	0.093	0.087	0.125	0.021	0.117
WBC _ min	0.01	0.163	0.613	0.663	0.867	0.218
TBil _ max	<0.001	0.008	0.035	0.006	<0.001	<0.001
TBil _ avg	<0.001	0.003	0.004	<0.001	<0.001	<0.001
TBil _ min	<0.001	0.001	<0.001	<0.001	0.088	0.002
ALT _max	0.008	0.043	0.007	<0.001	0.051	0.041
ALT _avg	0.375	0.005	<0.001	<0.001	0.715	0.527
ALT _ min	0.003	0.001	<0.001	<0.001	0.039	0.141
ALP _ max	<0.001	0.98	0.719	0.578	<0.001	<0.001
ALP _ avg	0.199	0.579	0.793	0.24	<0.001	<0.001
ALP _ min	0.002	0.327	0.44	0.098	0.001	<0.001
AST _max	<0.001	0.035	0.011	0.001	<0.001	<0.001
AST _avg	<0.001	0.003	<0.001	<0.001	0.007	0.002
AST _min	0.001	0.001	<0.001	<0.001	0.696	0.318
Magnesium _ max	<0.001	0.648	0.721	0.53	<0.001	<0.001
Magnesium _ avg	<0.001	0.186	0.637	0.426	0.014	0.127
Magnesium _ min	<0.001	0.578	0.857	0.923	0.036	0.005
Calcium _ max	0.045	1	0.83	0.757	0.42	0.683
Calcium _ avg	<0.001	0.684	0.162	0.193	0.002	0.003
Calcium _ min	<0.001	0.744	0.201	0.142	<0.001	<0.001
Phosphate _ max	<0.001	0.044	0.004	0.001	<0.001	<0.001
Phosphate _ avg	<0.001	0.001	<0.001	<0.001	0.016	0.053
Phosphate _ min	0.012	0.242	0.395	0.229	0.016	0.029
ICU, intensive care unit; MCH, mean corpuscular hemoglobin; MCHC, mean corpuscular hemoglobin concentration; MCV, mean corpuscular volume; PLT, platelet count; RDW, red cell distribution width; RBC, red blood cells; WBC, white blood cells; TBil, total bilirubin; ALT, alanine aminotransferase; ALP, alkaline phosphatase; AST, aspartate aminotransferase.
