# Supplementary material for: Utilizing Machine Learning Models for Predicting Outcomes in Acute Pancreatitis: Development and Validation in Three Retrospective Cohorts
Source: Research Square preprint supplement (doi:10.21203/rs.3.rs-5881028/v1), 2025-02-03
Supplement: Supplementary file 4 [file ab17774fe3cd7759da042f79.xlsx]

## Sheet: Sheet1
Table 3. Analysis of whether patients re-admitted within short term will die within 365 days after discharge
Outcomes	Patients re-admitted within 30 days after discharge			Patients re-admitted within 60 days after discharge			Patients re-admitted within 90 days after discharge
	Yes (n=222)	No (n=2255)	P-Value	Yes (n=288)	No (n=2189)	P-Value	Yes (n=322)	No (n=2155)	P-Value
Mortality within 180 days after discharge	7 (3.15%)	102 (4.52%)	0.436	8 (2.78%)	101 (4.61%)	0.202	9 (2.80%)	100 (4.64%)	0.174
Mortality within 365 days after discharge	10 (4.50%)	144 (6.39%)	0.336	13 (4.51%)	141 (6.44%)	0.253	15 (4.66%)	139 (6.45%)	0.263
