# Supplementary material for: Utilizing Machine Learning Models for Predicting Outcomes in Acute Pancreatitis: Development and Validation in Three Retrospective Cohorts
Source: Research Square preprint supplement (doi:10.21203/rs.3.rs-5881028/v1), 2025-02-03
Supplement: Supplementary file 5 [file b5055dbc88f4501fb5bd5872.xlsx]

## Sheet: Sheet1
Table 1. Baseline characteristics of patients
Characteristics	n (%), mean ± SD (range), or med [IQR]
	All the patients (n=2559)	Patients underwent operations (n=1091)	Patients admitted to the ICU (n=636)
Age (years)	57.00 [44.00-70.00]	64.00 [49.00-76.00]	59.50 [46.00-74.00]
Gender (male), n (%)	1305 (51.00%)	493 (45.19%)	366 (57.55%)
Length of stay in hospital (days)	4.62 [2.70-8.72]	4.88 [3.09-8.21]	11.25 [5.96-19.86]
Length of stay in ICU (hours)	0.00 [0.00-0.00]	0.00 [0.00-0.00]	67.51 [34.25-160.75]
Death in hospital, n (%)	82 (3.20%)	26 (2.38%)	76 (11.95%)
Re-admission within 30 days after discharge, n (%)	222 (8.68%)	78 (7.15%)	39 (6.96%)
Re-admission within 60 days after discharge, n (%)	288 (11.25%)	105 (9.62%)	56 (8.81%)
Re-admission within 90 days after discharge, n (%)	322 (12.58%)	114 (10.45%)	65 (10.22%)
Follow-up after discharge until death, n (%)	301 (11.76%)	150 (13.75%)	93 (14.62%)
Death within 180 days after discharge, n (%)	109 (4.26%)	53 (4.86%)	50 (7.86%)
Death within 365 days after discharge, n (%)	154 (6.02%)	82 (7.52%)	62 (9.75%)
Surgical operations, n (%)	425 (16.61%)	425 (38.96%)	69 (10.85%)
Endoscopy, n (%)	852 (33.29%)	852 (78.09%)	191 (30.03%)
Interventional operations, n (%)	815 (31.85%)	815 (74.70%)	178 (27.99%)
Surgical or interventional or endoscopic operations, n (%)	1091 (42.63%)	1091 (100%)	227 (35.69%)
Endoscopy combined with surgical operations, n (%)	196 (7.66%)	196 (17.97%)	35 (5.50%)
Endoscopy combined with interventional operations, n (%)	803 (31.38%)	803 (73.60%)	176 (27.67%)
Surgical or interventional operations other than endoscopy, n (%)	239 (9.34%)	239 (21.91%)	36 (5.66%)
Endoscopic, surgical, and interventional procedures were performed during a single hospitalization, n (%)	193 (7.54%)	193 (17.69%)	35 (5.50%)
Hypertension, n (%)	1082 (42.28%)	476 (43.63%)	302 (47.48%)
Diabetes, n (%)	523 (20.44%)	223 (20.44%)	172 (27.04%)
Anion gap _ max (mEq/L)	16.00 [14.00-18.00]	16.00 [14.00-18.00]	19.00 [16.00-22.00]
Anion gap _ avg (mEq/L)	13.50 [12.10-15.00]	13.50 [12.25-14.81]	13.98 [12.50-15.86]
Anion gap _ min (mEq/L)	11.00 [10.00-13.00]	11.00 [10.00-13.00]	10.00 [9.00-12.00]
Bicarbonate _ max (mEq/L)	28.00 [26.00-30.00]	28.00 [26.00-30.00]	29.00 [26.00-32.00]
Bicarbonate _ avg (mEq/L)	25.12 [23.29-27.00]	25.12 [23.46-26.81]	24.17 [21.77-26.25]
Bicarbonate _ min (mEq/L)	23.00 [20.00-25.00]	23.00 [20.00-25.00]	19.00 [15.00-22.00]
Chloride _ max (mEq/L)	106.00 [104.00-109.00]	106.00 [104.00-109.00]	109.50 [105.00-114.00]
Chloride _ avg (mEq/L)	103.50 [101.00-106.00]	103.67 [101.33-105.92]	103.32 [100.45-106.32]
Chloride _ min (mEq/L)	101.00 [97.00-103.00]	101.00 [98.00-104.00]	97.00 [93.00-101.00]
Creatinine _ max (mg/dL)	0.90 [0.70-1.20]	0.90 [0.70-1.20]	1.30 [0.90-2.60]
Creatinine _ avg (mg/dL)	0.78 [0.63-1.00]	0.78 [0.63-1.00]	0.93 [0.67-1.54]
Creatinine _ min (mg/dL)	0.70 [0.50-0.90]	0.70 [0.60-0.80]	0.70 [0.50-0.92]
Glucose _ max (mg/dL)	131.00 [105.00-182.75]	130.00 [106.00-168.00]	194.50 [144.00-277.50]
Glucose _ avg (mg/dL)	106.50 [92.14-128.32]	104.20 [91.71-122.82]	125.10 [106.50-157.53]
Glucose _ min (mg/dL)	84.00 [73.00-96.00]	83.00 [71.00-94.00]	83.00 [72.00-96.00]
Potassium _ max (mEq/L)	4.30 [4.00-4.70]	4.20 [4.00-4.60]	4.80 [4.30-5.30]
Potassium _ avg (mEq/L)	3.90 [3.70-4.13]	3.88 [3.68-4.10]	3.92 [3.73-4.17]
Potassium _ min (mEq/L)	3.50 [3.20-3.80]	3.50 [3.20-3.70]	3.20 [3.00-3.50]
Sodium _ max (mEq/L)	141.00 [139.00-143.00]	141.00 [139.00-143.00]	143.00 [140.00-147.25]
Sodium _ avg (mEq/L)	139.00 [137.00-141.00]	139.00 [137.33-140.87]	138.75 [136.50-141.15]
Sodium _ min (mEq/L)	137.00 [134.00-139.00]	137.00 [134.00-139.00]	134.00 [131.00-136.00]
Urea nitrogen _ max (mg/dL)	14.00 [10.00-24.00]	15.00 [11.00-24.00]	28.00 [16.00-56.00]
Urea nitrogen _ avg (mg/dL)	11.00 [7.61-17.39]	11.50 [8.18-17.83]	17.73 [10.55-33.74]
Urea nitrogen _ min (mg/dL)	8.00 [5.00-12.00]	8.00 [6.00-12.00]	9.00 [6.00-15.00]
Hematocrit _ max (%)	37.20 [34.00-40.70]	37.20 [34.25-40.35]	36.60 [33.10-40.80]
Hematocrit _ avg (%)	34.27 [30.52-37.49]	34.27 [30.85-37.30]	30.32 [27.50-34.20]
Hematocrit _ min (%)	32.10 [27.60-35.75]	32.10 [28.10-35.40]	26.00 [21.98-30.90]
Hemoglobin _ max (g/dL)	12.40 [11.20-13.60]	12.40 [11.30-13.50]	12.20 [10.90-13.62]
Hemoglobin _ avg (g/dL)	11.45 [10.10-12.60]	11.45 [10.18-12.41]	10.08 [8.99-11.41]
Hemoglobin _ min (g/dL)	10.70 [9.10-12.00]	10.70 [9.30-11.90]	8.50 [7.20-10.20]
MCH _ max (pg)	30.90 [29.50-32.40]	30.90 [29.50-32.20]	31.40 [30.20-33.30]
MCH _ avg (pg)	30.35 [29.00-31.80]	30.27 [29.00-31.64]	30.44 [29.24-32.17]
MCH _ min (pg)	29.80 [28.40-31.30]	29.80 [28.40-31.10]	29.70 [28.20-31.13]
MCHC _ max (g/dL)	34.10 [33.10-35.00]	34.01 (1.32)	34.30 [33.48-35.40]
MCHC _ avg (g/dL)	33.30 [32.48-34.14]	33.28 [32.45-34.03]	33.06 [32.30-33.84]
MCHC _ min (g/dL)	32.60 [31.60-33.50]	32.50 [31.60-33.40]	31.80 [30.80-32.60]
MCV _ max (fL)	92.00 [88.00-97.00]	92.00 [89.00-96.00]	95.00 [91.00-101.00]
MCV _ avg (fL)	91.00 [87.00-95.00]	90.80 [87.50-94.18]	92.10 [88.29-96.76]
MCV _ min (fL)	89.00 [86.00-93.00]	89.00 [86.00-93.00]	89.00 [86.00-93.00]
PLT _ max (K/μL)	263.00 [198.00-364.00]	263.00 [200.00-343.00]	341.00 [214.75-536.25]
PLT _ avg (K/μL)	226.86 [171.43-296.25]	226.86 [178.00-288.50]	231.53 [153.00-327.84]
PLT _ min (K/μL)	188.00 [135.00-244.00]	190.00 [145.50-243.50]	136.00 [92.75-191.00]
RDW _ max (%)	14.10 [13.20-15.60]	14.10 [13.30-15.50]	15.60 [14.30-17.60]
RDW _ avg (%)	13.83 [13.05-15.00]	13.83 [13.07-14.95]	14.80 [13.85-16.34]
RDW _ min (%)	13.50 [12.80-14.50]	13.50 [12.90-14.50]	14.00 [13.20-15.10]
RBC _ max (m/μL)	4.11 [3.72-4.52]	4.11 [3.75-4.50]	4.00 [3.53-4.48]
RBC _ avg (m/μL)	3.79 [3.35-4.19]	3.79 [3.39-4.14]	3.32 [2.93-3.76]
RBC _ min (m/μL)	3.56 [3.01-4.00]	3.56 [3.10-3.94]	2.81 [2.37-3.42]
WBC _ max (K/μL)	11.00 [7.70-16.48]	11.50 [8.15-16.60]	17.50 [12.60-24.33]
WBC _ avg (K/μL)	8.80 [6.51-12.03]	8.95 [6.74-12.07]	11.64 [8.57-15.13]
WBC _ min (K/μL)	6.60 [5.00-8.90]	6.60 [5.20-8.70]	6.90 [5.10-9.33]
TBil _ max (mg/dL)	1.10 [0.60-3.00]	1.80 [0.80-4.60]	1.70 [0.80-4.60]
TBil _ avg (mg/dL)	0.85 [0.50-1.81]	1.20 [0.65-2.64]	1.05 [0.56-2.24]
TBil _ min (mg/dL)	0.60 [0.40-1.10]	0.70 [0.40-1.40]	0.60 [0.30-1.10]
ALT _max (IU/L)	77.00 [30.00-222.00]	145.00 [63.00-312.00]	86.00 [43.00-217.25]
ALT _avg (IU/L)	53.68 [24.00-144.39]	95.50 [43.86-208.33]	52.85 [28.08-111.88]
ALT _ min (IU/L)	34.00 [17.00-82.00]	56.00 [26.00-123.00]	27.00 [15.00-46.00]
ALP _ max (IU/L)	126.00 [80.50-216.50]	164.00 [108.00-275.00]	146.50 [97.00-247.00]
ALP _ avg (IU/L)	107.58 [73.17-173.35]	135.50 [92.17-218.50]	107.58 [76.25-173.00]
ALP _ min (IU/L)	88.00 [61.00-137.00]	108.00 [74.00-176.00]	73.00 [53.00-114.00]
AST _max (IU/L)	78.00 [33.00-189.00]	112.00 [59.00-231.00]	110.00 [54.00-283.00]
AST _avg (IU/L)	51.50 [26.00-103.26]	67.56 [39.00-121.00]	59.19 [35.58-121.94]
AST _min (IU/L)	29.00 [19.00-50.00]	33.00 [21.00-57.00]	28.00 [19.00-42.00]
Magnesium _ max (mg/dL)	2.10 [1.90-2.40]	2.10 [1.90-2.30]	2.40 [2.20-2.70]
Magnesium _ avg (mg/dL)	1.93 [1.80-2.05]	1.93 [1.80-2.02]	1.99 [1.89-2.11]
Magnesium _ min (mg/dL)	1.70 [1.50-1.90]	1.70 [1.60-1.90]	1.60 [1.50-1.80]
Calcium _ max (mg/dL)	9.00 [8.60-9.30]	8.90 [8.60-9.20]	9.00 [8.60-9.50]
Calcium _ avg (mg/dL)	8.55 [8.17-8.90]	8.55 [8.20-8.86]	8.20 [7.85-8.57]
Calcium _ min (mg/dL)	8.20 [7.60-8.60]	8.20 [7.80-8.60]	7.40 [6.80-7.90]
Phosphate _ max (mg/dL)	3.80 [3.20-4.50]	3.70 [3.20-4.30]	4.60 [3.80-5.90]
Phosphate _ avg (mg/dL)	3.15 [2.70-3.66]	3.15 [2.70-3.47]	3.24 [2.73-3.80]
Phosphate _ min (mg/dL)	2.50 [1.90-3.10]	2.50 [2.00-2.90]	1.90 [1.40-2.50]
SIRS score	-	-	3.00 [2.00-4.00]
SOFA score	-	-	5.00 [3.00-8.00]
Sepsis, n (%)	-	-	407 (63.99%)
AKI, n (%)	-	-	430 (67.61%)
Duration of auxiliary ventilation (hours)	-	-	0.00 [0.00-40.11]
Heart rate on the first day of ICU _ max (beats/minute)	-	-	93.68 [80.95-107.04]
Heart rate on the first day of ICU _ avg (beats/minute)	-	-	114.00 [97.00-128.00]
Heart rate on the first day of ICU _ min (beats/minute)	-	-	79.00 [67.00-92.00]
SysBP on the first day of ICU _ max (mmHg)	-	-	121.00 [110.17-134.47]
SysBP on the first day of ICU _ avg (mmHg)	-	-	147.00 [133.00-163.00]
SysBP on the first day of ICU _ min (mmHg)	-	-	98.00 [87.75-111.00]
DiasBP on the first day of ICU _ max (mmHg)	-	-	68.23 [60.48-77.45]
DiasBP on the first day of ICU _ avg (mmHg)	-	-	91.00 [79.00-104.00]
DiasBP on the first day of ICU _ min (mmHg)	-	-	52.00 [44.00-62.00]
Mean arterial pressure on the first day of ICU admission _ max (mmHg)	-	-	81.14 [72.69-90.69]
Mean arterial pressure on the first day of ICU admission _ avg (mmHg)	-	-	102.00 [91.00-116.00]
Mean arterial pressure on the first day of ICU admission _ min (mmHg)	-	-	65.00 [55.00-74.00]
Respiratory rate on the first day of ICU _ max (beats/mins)	-	-	20.44 [17.63-23.55]
Respiratory rate on the first day of ICU _ avg (beats/mins)	-	-	29.00 [25.00-34.00]
Respiratory rate on the first day of ICU _ min (beats/mins)	-	-	14.00 [12.00-16.00]
Temperature on the first day of ICU admission _ max(℃)	-	-	36.97 [36.71-37.34]
Temperature on the first day of ICU admission _ avg (℃)	-	-	37.44 [37.06-38.11]
Temperature on the first day of ICU admission _ min (℃)	-	-	36.56 [36.22-36.83]
SpO2 on the first day of ICU _ max (%)	-	-	96.12 [94.71-97.56]
SpO2 on the first day of ICU _ avg (%)	-	-	100.00 [98.00-100.00]
SpO2 on the first day of ICU _ min (%)	-	-	92.00 [90.00-94.00]
SD, standard deviation; IQR, inter-quartile range; ICU, intensive care unit; MCH, mean corpuscular hemoglobin; MCHC, mean corpuscular hemoglobin concentration; MCV, mean corpuscular volume; PLT, platelet count; RDW, red cell distribution width; RBC, red blood cells; WBC, white blood cells; TBil, total bilirubin; ALT, alanine aminotransferase; ALP, alkaline phosphatase; AST, aspartate aminotransfe…
