# Supplementary material for: Utilizing Machine Learning Models for Predicting Outcomes in Acute Pancreatitis: Development and Validation in Three Retrospective Cohorts
Source: Research Square preprint supplement (doi:10.21203/rs.3.rs-5881028/v1), 2025-02-03
Supplement: Supplementary file 6 [file e2fbfed80142917cd08d153d.xlsx]

## Sheet: Sheet4
Table 5. Optimal machine-learning algorithms for predicting various outcomes corresponding to patient categories
Outcomes	AUC in internal validation set	AUC in eICU database	AUC in Wenzhou hospital
All-In-hospital mortality	RF (0.966)	-	-
All-Re-admission within 30 days after discharge	LR (0.592)	-	-
All-Re-admission within 60 days after discharge	XGB (0.653)	-	-
All-Re-admission within 90 days after discharge	XGB (0.664)	-	-
All-Mortality within 180 days after discharge	XGB (0.844)	-	-
All-Mortality within 365 days after discharge	XGB (0.820)	-	-
Operation-In-hospital mortality	XGB (0.930)	-	-
Operation-Re-admission within 30 days after discharge	LGBM (0.635)	-	-
Operation-Re-admission within 60 days after discharge	XGB (0.667)	-	-
Operation-Re-admission within 90 days after discharge	XGB (0.654)	-	-
Operation-Mortality within 180 days after discharge	LR (0.850)	-	-
Operation-Mortality within 365 days after discharge	RF (0.904)	-	-
ICU-In-hospital mortality	RF (0.938)	XGB (0.930)	RF (0.844)
ICU-Re-admission within 30 days after discharge	RF (0.665)	-	-
ICU-Re-admission within 60 days after discharge	RF (0.756)	-	-
ICU-Re-admission within 90 days after discharge	LGBM (0.778)	-	-
ICU-Mortality within 180 days after discharge	LR (0.745)	-	-
ICU-Mortality within 365 days after discharge	XGB (0.712)	-	-
ICU, intensive care unit; AUC, area under the curve; RF, random forest; LR, logistic regression; XGB, eXtreme gradient boosting; LGBM, light gradient boosting machine.
